# Supplementary material for: FeNi3 nanoparticles for electrocatalytic synthesis of urea from carbon dioxide and nitrate
Source: Royal Society of Chemistry journal article supplement (doi:10.1039/d3qm00627a), 2023-01-01
Supplement: d3qm00627a1.pdf [file d3qm00627a1.pdf]

## Supporting Information

### **FeNi<sub>3</sub> nanoparticles for electrocatalytic synthesis of urea from carbon dioxide and nitrate**

*Hou et al.*

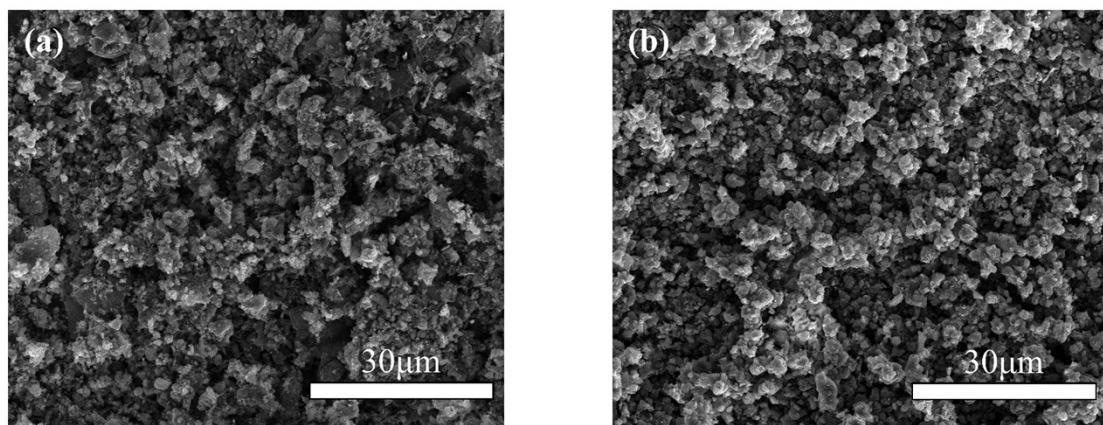

**Figure S1.** SEM images of (a) Fe/NC and (b) Ni/NC.

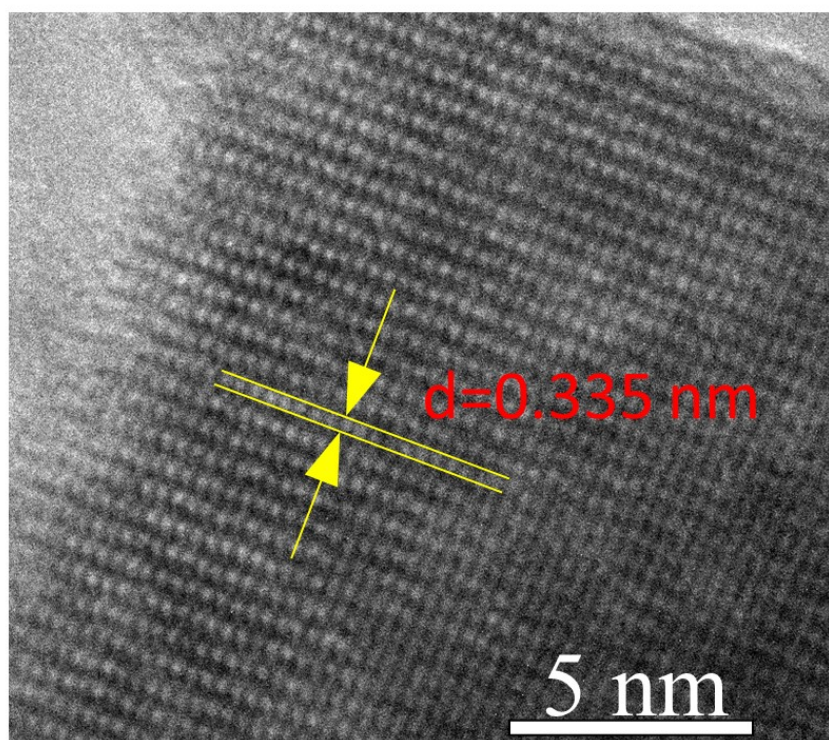

**Figure S2.** HRTEM images of FeNi/NC.

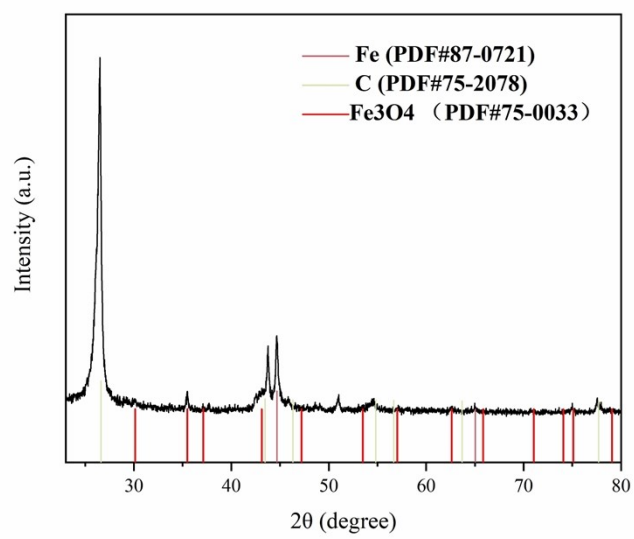

**Figure S3.** XRD patterns of Fe/NC.

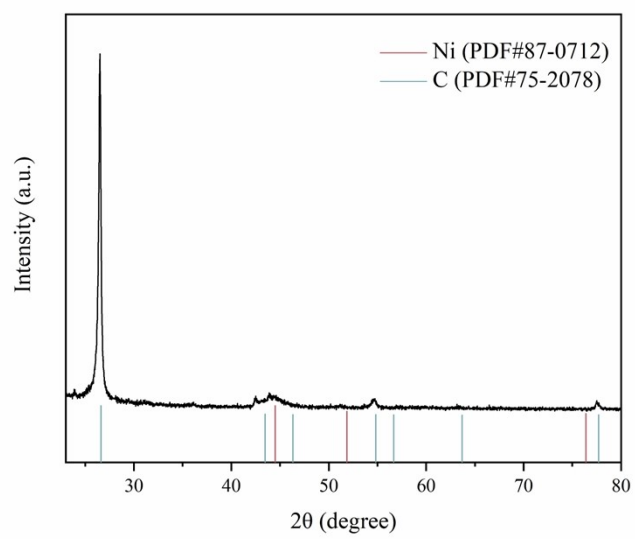

**Figure S4.** XRD patterns of Ni/NC.

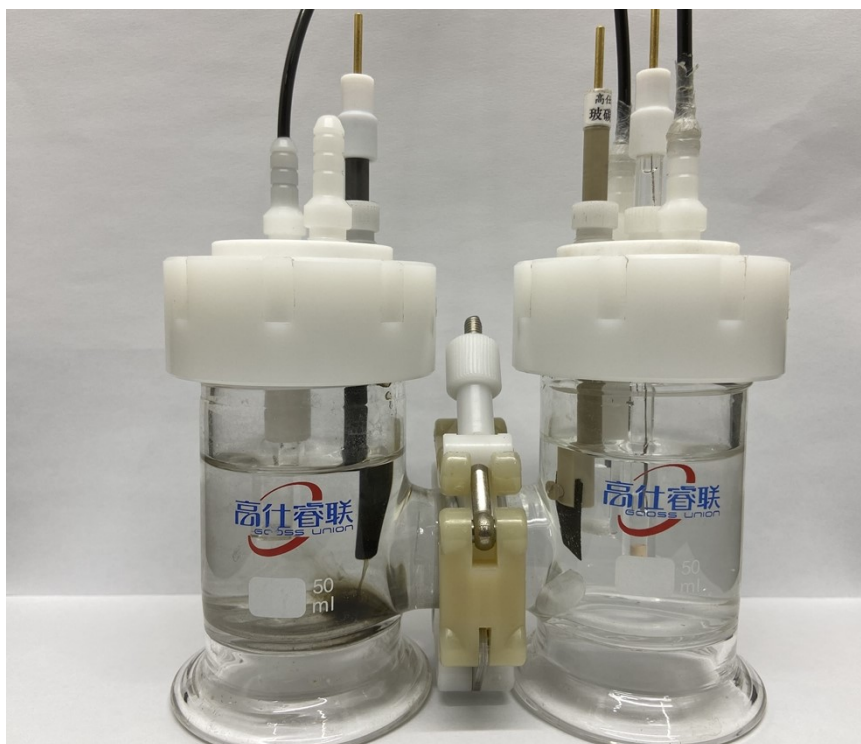

**Figure S5.** The optical photograph of the H-shaped cell with three-electrode.

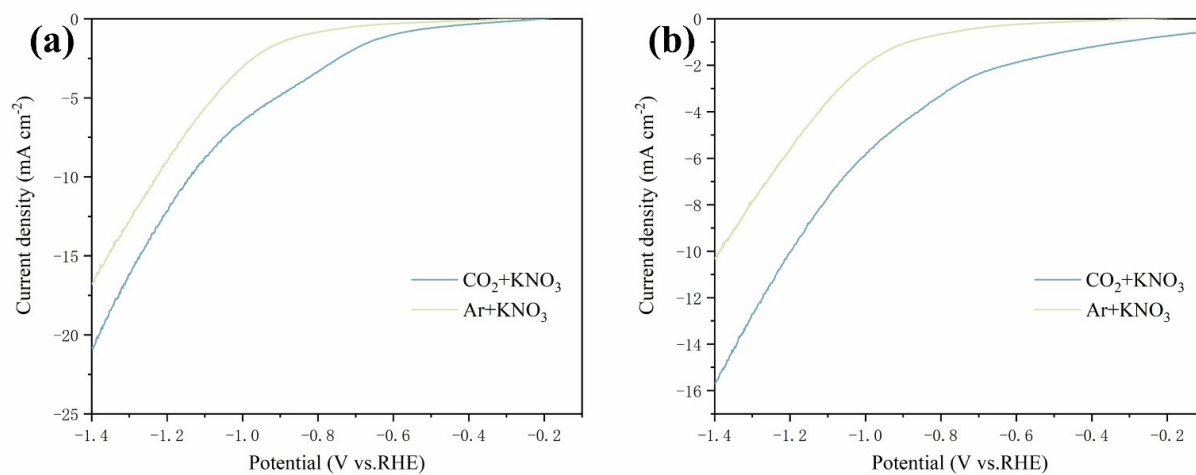

**Figure S6.** LSV curves for (a) Fe/NC, and (b) Ni/NC in the Ar/CO<sub>2</sub>-saturated 0.1 M KNO<sub>3</sub>, the scan rate is 10 mV s<sup>-1</sup>.

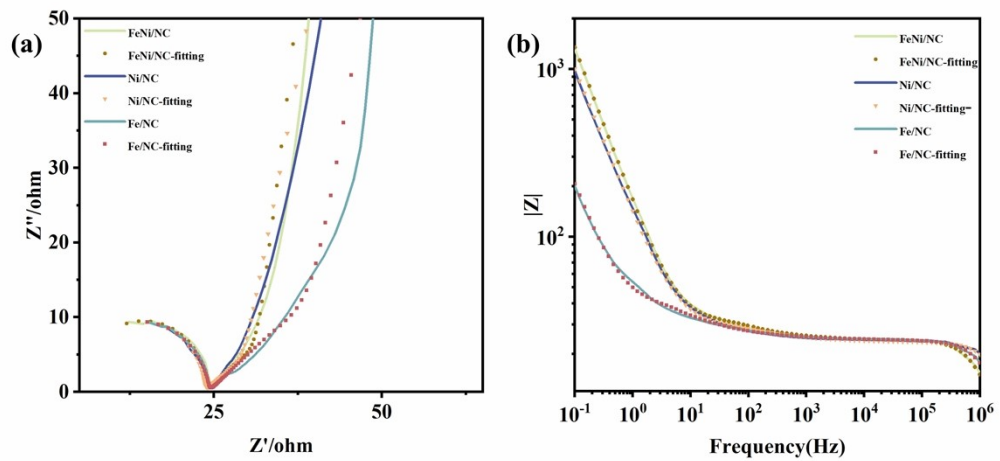

**Figure S7.** The electrochemical impedance spectra of the FeNi/NC, Fe/NC and Ni/NC.



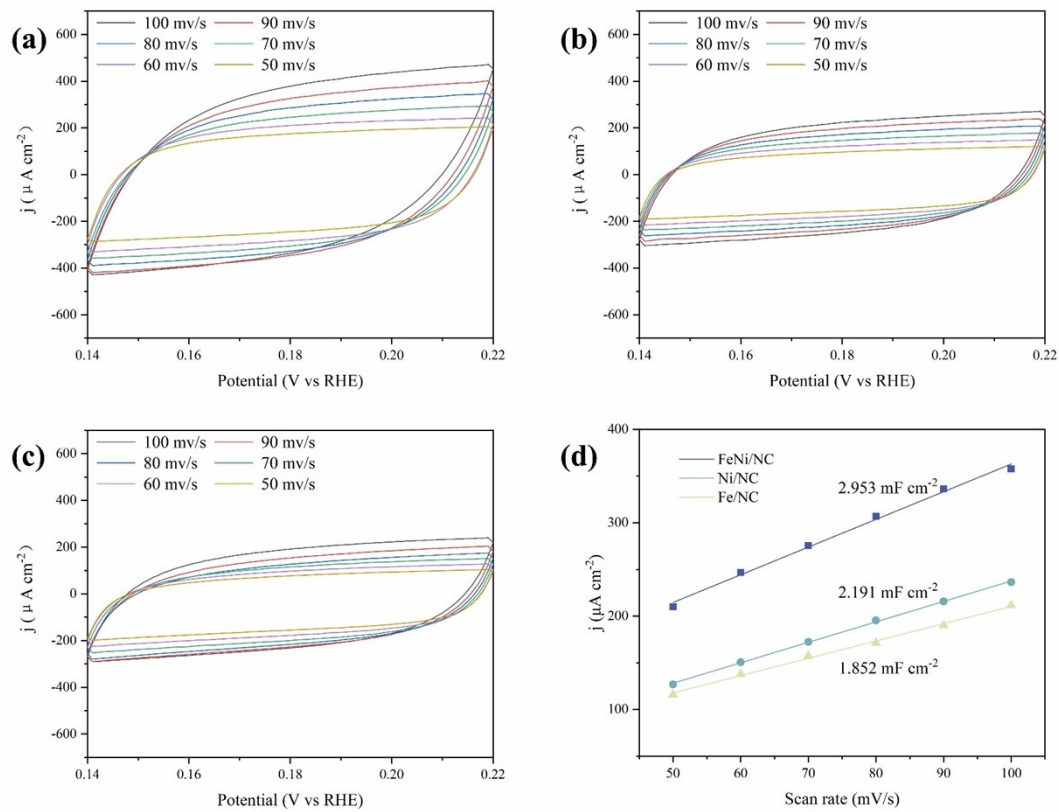

**Figure S8.** The cyclic voltammograms of (a) FeNi/NC, (b) Ni/NC, and (c) Fe/NC at different scan rates from 50 to 100  $\text{mV s}^{-1}$  at the potential window of 0.14 - 0.22 V (vs RHE). (d) The corresponding capacitive current at 0.18 V vs scan rates.

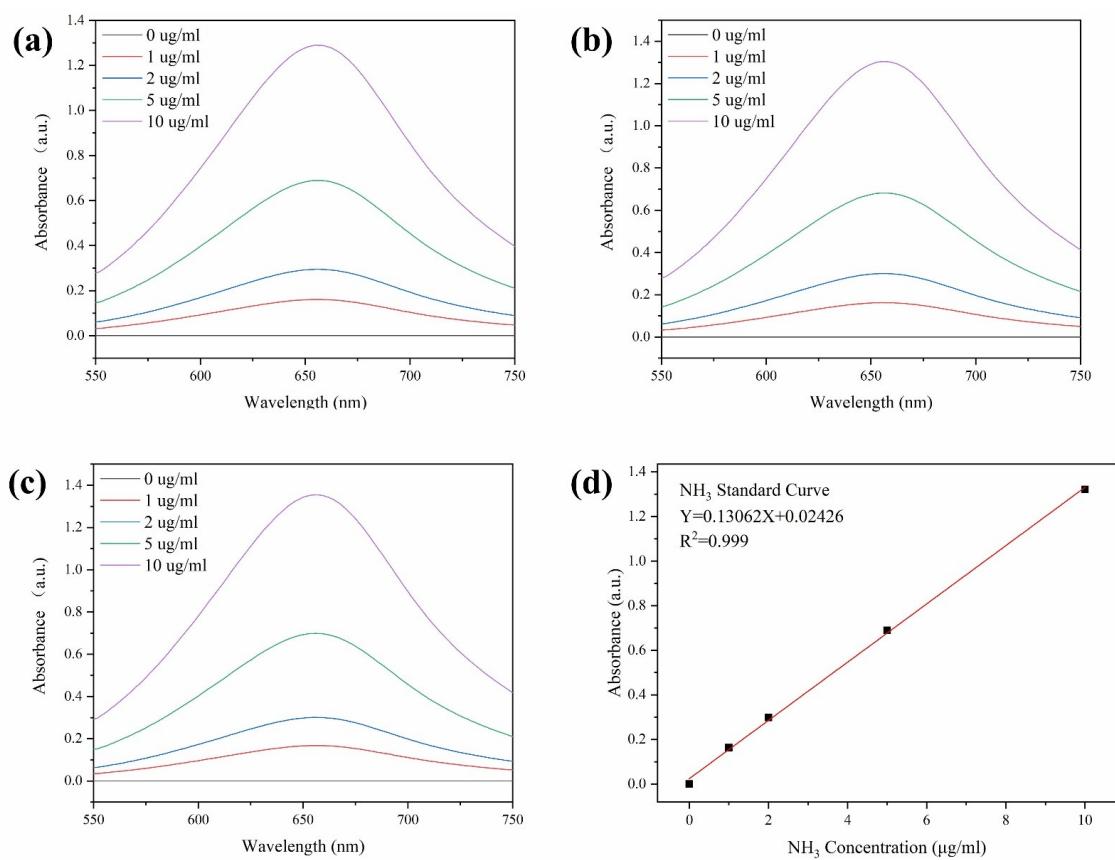

**Figure S9.** (a-c) UV-vis absorption spectra of various  $\text{NH}_3$  concentrations obtained from three repeated experiments. (d) Calibration curve used for estimating  $\text{NH}_3$  concentration.

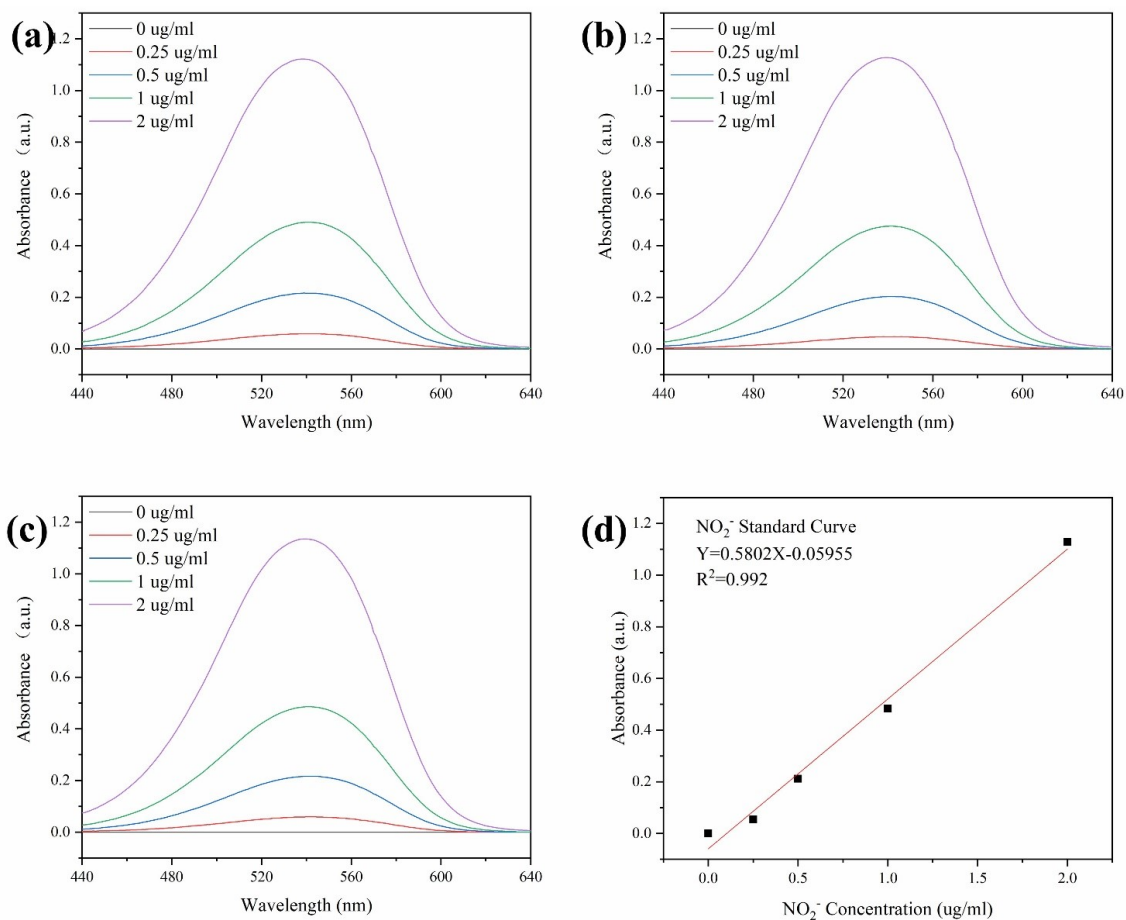

**Figure S10.** (a-c) UV-Vis absorption spectra of different  $\text{NO}_2^-$  concentrations obtained from three repeated experiments. (d) Calibration curve used for estimating  $\text{NO}_2^-$  concentration.

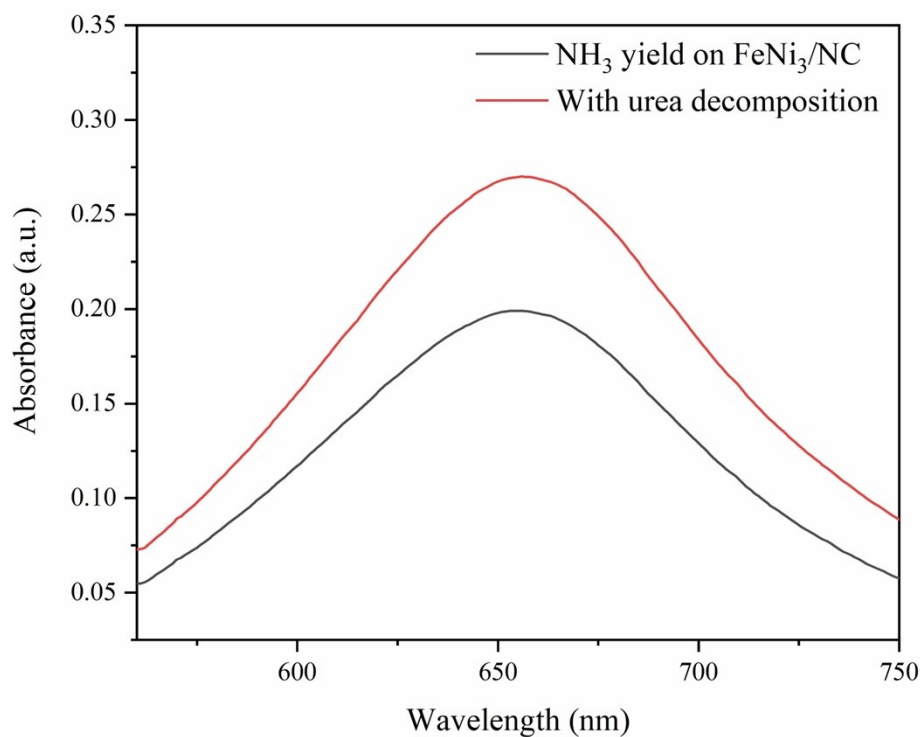

**Figure S11.** The UV-vis absorbance curve of FeNi/NC under the applied potential of -0.9 V vs RHE with and without urease decomposition.

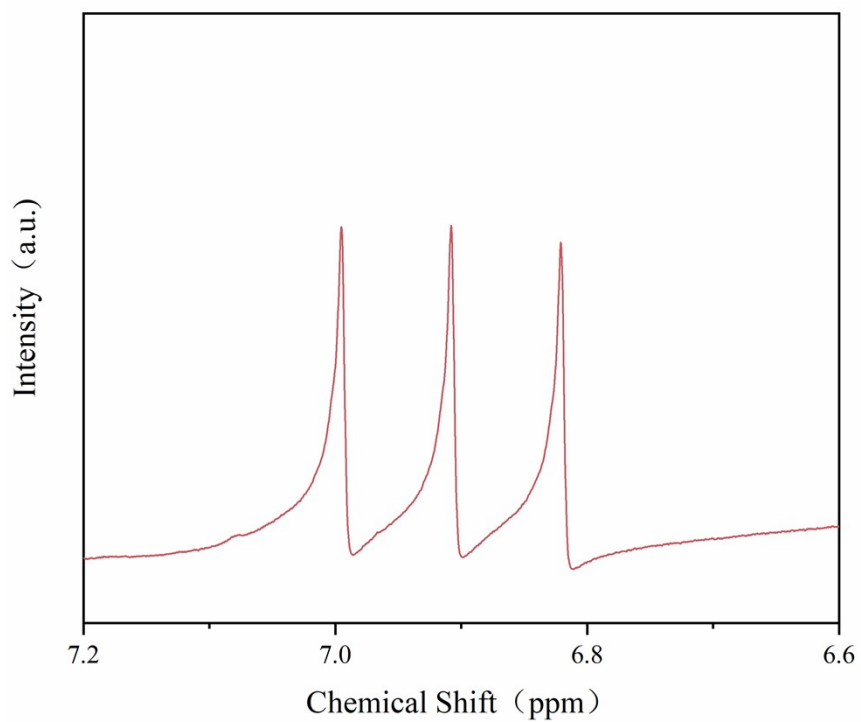

**Figure S12.** The <sup>1</sup>H NMR spectra of identification for electrochemical ammonia synthesis. The <sup>1</sup>H NMR spectra of ammonia derived from urea product generation through urease catalysis were obtained from a 0.1 M KNO<sub>3</sub> electrolyte after 1 h of electrolysis of FeNi<sub>3</sub>/NC catalyst at -0.9 V vs RHE. The electrolyte was then concentrated at 60 °C, resulting in the acquisition of the spectra.

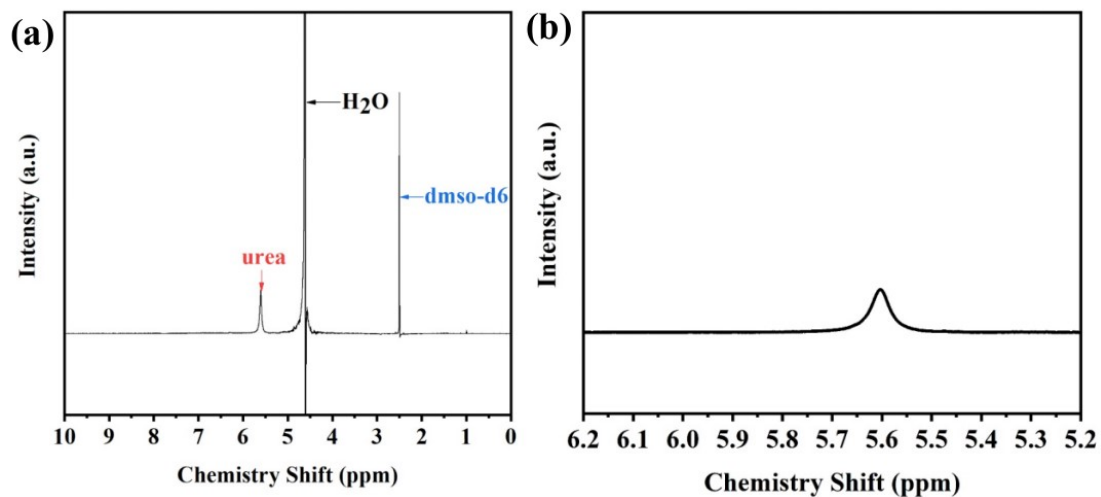

**Figure S13.** (a) The full  $^1\text{H}$  NMR spectra. (b) Identification of electrochemical urea synthesis. The  $^1\text{H}$  NMR spectra of urea were obtained from a 0.1 M  $\text{KNO}_3$  electrolyte after 1 h of electrolysis of  $\text{FeNi}_3/\text{NC}$  catalyst at  $-0.9$  V vs RHE. The electrolyte was then concentrated at  $60$   $^\circ\text{C}$ , resulting in the acquisition of the spectra.

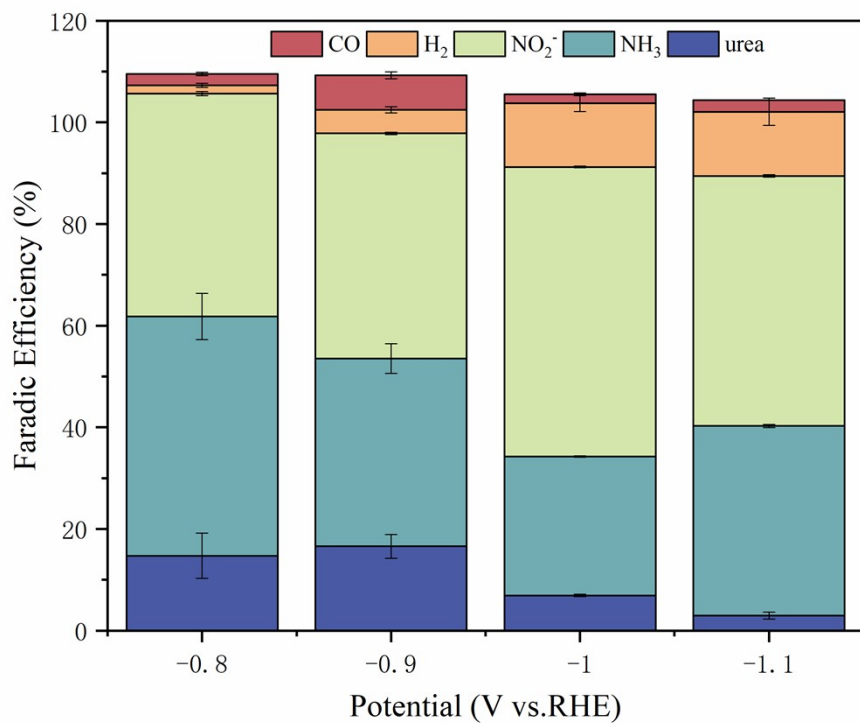

**Figure S14.** All possible products distribution for FeNi/NC during electrocatalytic urea synthesis at various potentials.

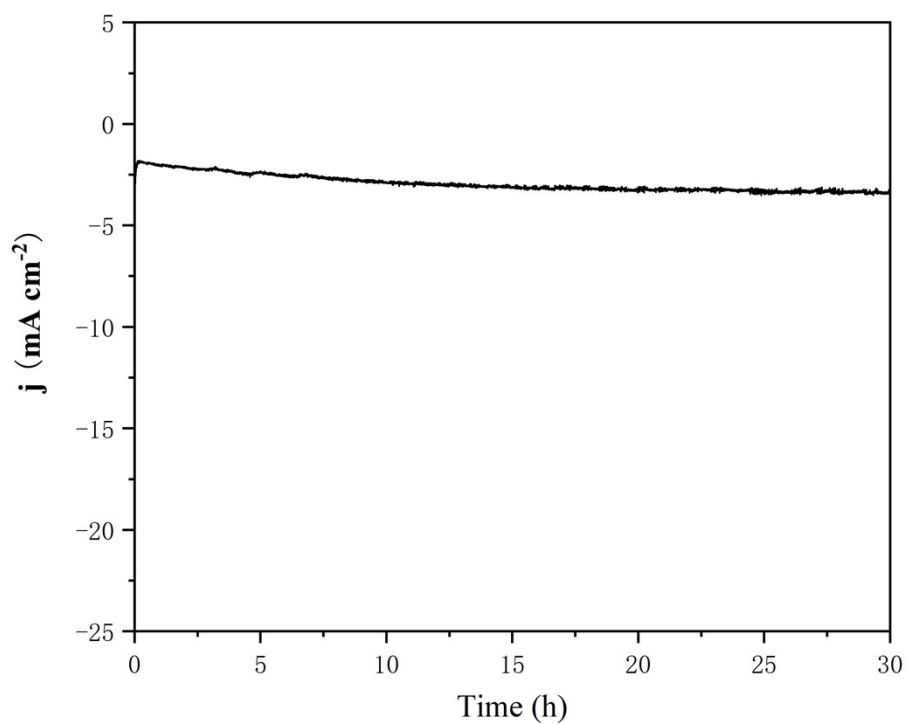

**Figure S15.** The stability test of the FeNi/ NC at -0.9V vs RHE in  $\text{CO}_2$ -saturated 0.1 M  $\text{KNO}_3$ . During the electrochemical synthesis of urea, and no significant decay was observed within 30 h.



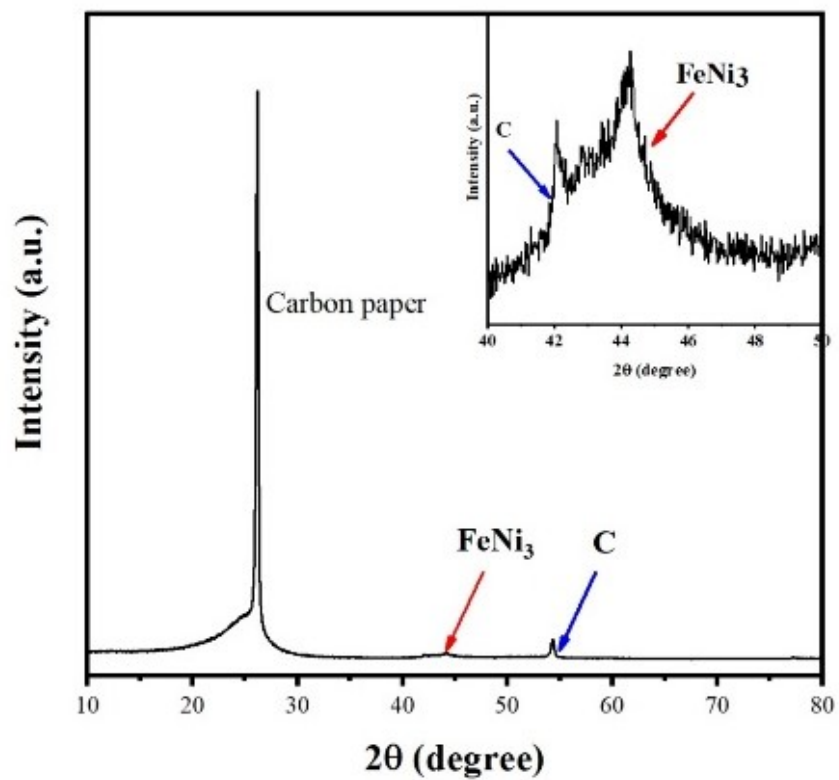

**Figure S16.** The XRD patterns of FeNi/NC loaded on the carbon paper after 30h stability test.

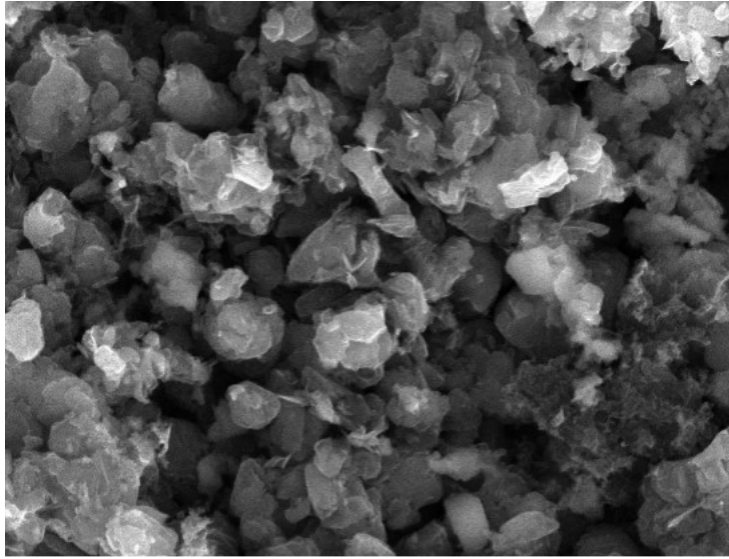

**Figure S17.** The SEM image of FeNi/NC loaded on the carbon paper after 30 h stability test.

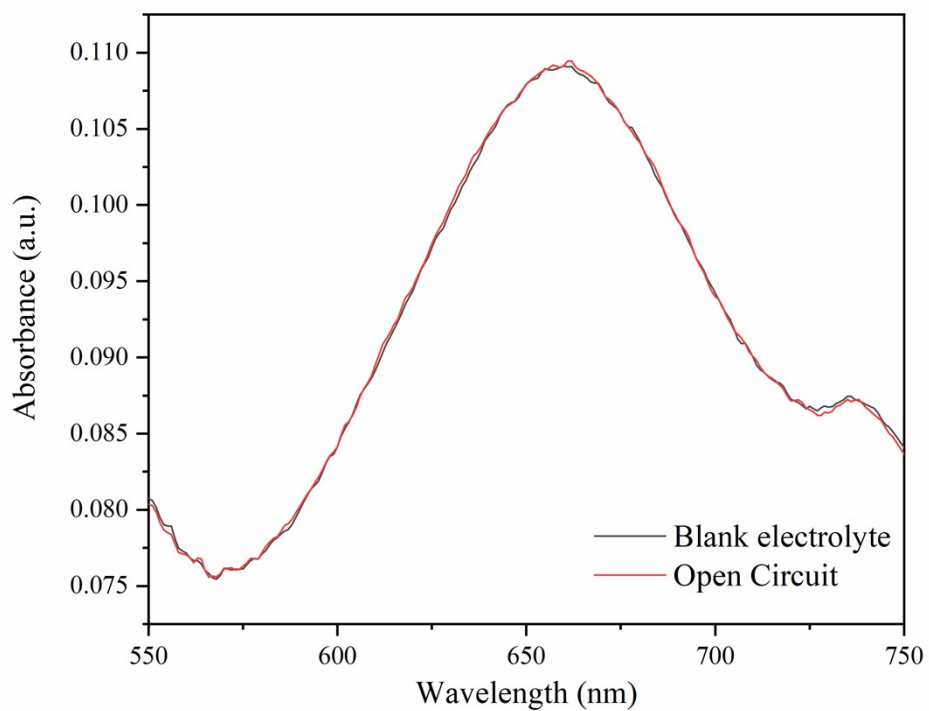

**Figure S18.** The UV vis absorbance spectra of the blank electrolyte and open circuit potential in CO<sub>2</sub>-saturated 0.1 M KNO<sub>3</sub>.

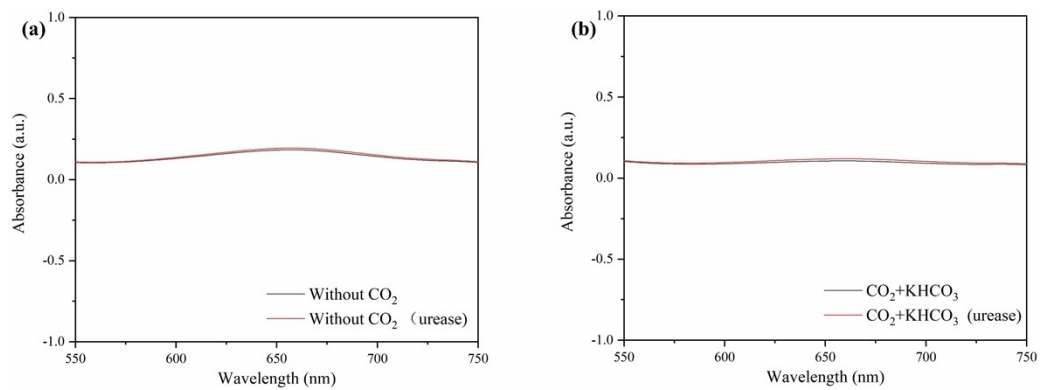

**Figure S19.** (a) In the absence of CO<sub>2</sub>, i.e. CO<sub>2</sub>-saturated 0.1 M KNO<sub>3</sub>. (b) In the absence of NO<sub>3</sub><sup>-</sup>, i.e. CO<sub>2</sub>-saturated 0.1 M KHCO<sub>3</sub>. The absorbance of samples with and without urease was compared, and similar absorbance values were observed in both cases, indicating the absence of urea products.

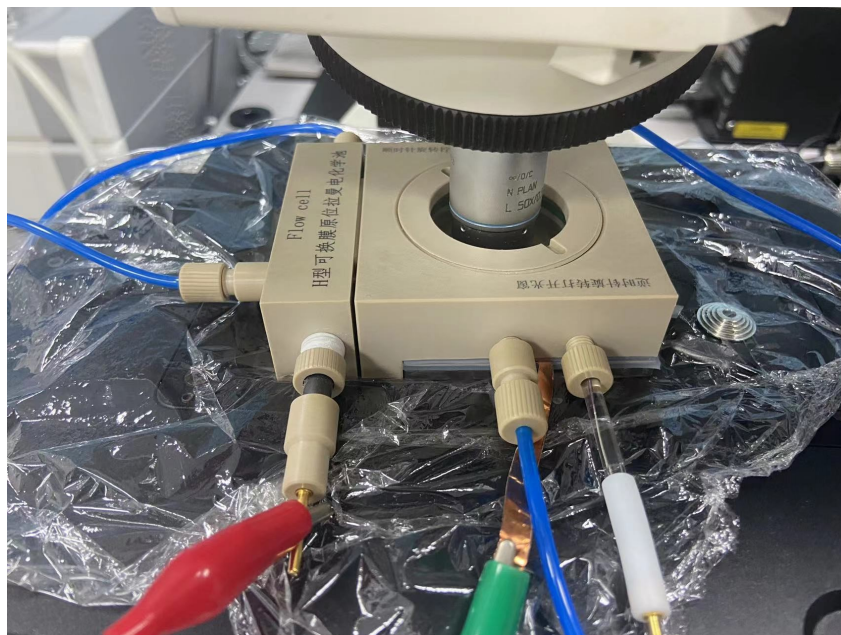

**Figure S20.** The optical photograph of the in-situ Raman device for urea electroanalysis.

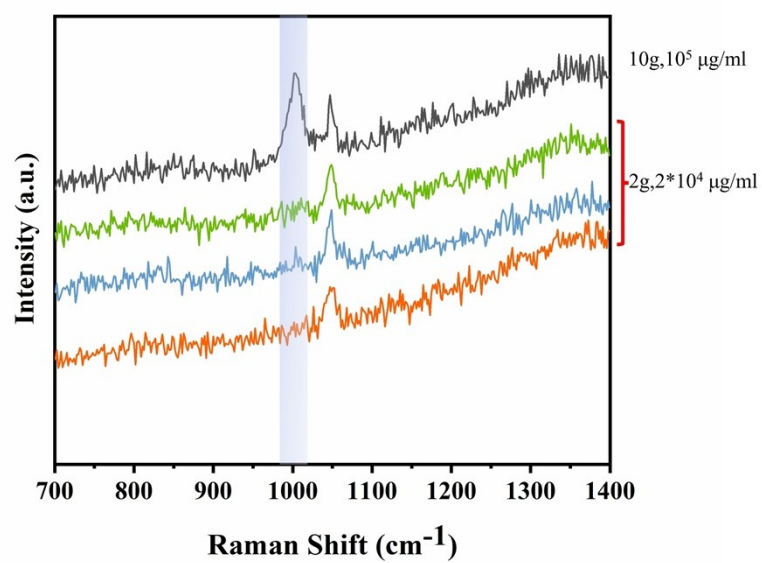

**Figure S21.** Added 10 g and 2 g of pure urea to the 100 mL 0.1 M KNO<sub>3</sub> electrolyte, resulting in urea concentrations of 10<sup>6</sup> μg/ml and 2 × 10<sup>5</sup> μg/ml, respectively.

**Table S1.** Comparison of the electrocatalytic urea production activity of FeNi/NC with previously reported urea electrosynthesis catalysts.

| Catalyst                                        | Reactant                      | Electrolyte                                        | Urea Yield<br>( $\mu\text{g h}^{-1}\text{mg}_{\text{cat}}^{-1}$ ) | FE     | Cite                                                    |
|-------------------------------------------------|-------------------------------|----------------------------------------------------|-------------------------------------------------------------------|--------|---------------------------------------------------------|
| FeNi/NC                                         | $\text{NO}_3^- + \text{CO}_2$ | 0.1 M $\text{KNO}_3$                               | 796.5                                                             | 16.58% | This work                                               |
| $\text{In}(\text{OH})_3\text{-S}$               | $\text{NO}_3^- + \text{CO}_2$ | 0.1 M $\text{KNO}_3$                               | 533.1                                                             | 54.3%  | Nat. Sustain.<br>2021, 4, 868–<br>876.                  |
| $\text{P}_{25}/\text{In}/\text{SnO}_2$          | $\text{NO}_3^- + \text{CO}_2$ | 0.1 M $\text{KNO}_3$                               | NA                                                                | 40%    | Nat. Chem.<br>2020, 12,<br>717724.                      |
| $\text{Pd}_1\text{Cu}_1/\text{TiO}_2\text{400}$ | $\text{N}_2 + \text{CO}_2$    | 0.1 M $\text{KHCO}_3$                              | 201.8                                                             | 8.9%   | Nat. Chem.<br>2020, 12,<br>717724.                      |
| Bi/BiVO <sub>4</sub>                            | $\text{N}_2 + \text{CO}_2$    | 0.1 M $\text{KHCO}_3$                              | 354.9                                                             | 12.6%  | Angew.<br>Chem.<br>Int. Ed. 2021,<br>60,<br>1091010918. |
| FLPs/InOOH100                                   | $\text{N}_2 + \text{CO}_2$    | 0.1 M $\text{KHCO}_3$                              | 411.4                                                             | 20.9%  | Chem Catal.<br>2022, 2(2),<br>309320.                   |
| $\text{BiFeO}_3/\text{BiVO}_4$                  | $\text{N}_2 + \text{CO}_2$    | 0.1 M $\text{KHCO}_3$                              | 296.7                                                             | 17.2%  | Chem Sci.<br>2021, 12,<br>6048-6058.                    |
| Te–Pd NCs                                       | $\text{NO}_2^- + \text{CO}_2$ | 0.05 M<br>$\text{KNO}_2$                           | NA                                                                | 12.2%  | Nano Lett.<br>2020,<br>20, 8282-<br>8289                |
| Cu-N-C single<br>atoms                          | $\text{NO}_3^- + \text{CO}_2$ | 0.1 M<br>$\text{KHCO}_3 + 0.1$<br>M $\text{KNO}_3$ | 1800                                                              | 28%    | Adv. Energy<br>Mater. 2022,<br>12, 2201500.             |
| F-doped carbon<br>nanotubes                     | $\text{NO}_3^- + \text{CO}_2$ | 0.1 M $\text{KNO}_3$                               | 381.9                                                             | 18%    | Appl. Catal.<br>B.<br>2022, 316,<br>121618              |

|                                                      |                                               |                                                   |                          |           |                                               |
|------------------------------------------------------|-----------------------------------------------|---------------------------------------------------|--------------------------|-----------|-----------------------------------------------|
| Fe(a)@C/Fe <sub>3</sub> O <sub>4</sub> -CNTs         | NO <sub>3</sub> <sup>-</sup> +CO <sub>2</sub> | 0.1 M KNO <sub>3</sub>                            | 1341.3±112.6             | 16.5±6.1% | Angew. Chem. Int. Ed.                         |
| V <sub>0</sub> -InOOH                                | NO <sub>3</sub> <sup>-</sup> +CO <sub>2</sub> | 0.1 M KNO <sub>3</sub>                            | 592.5                    | 51%       | ACS Nano 2022, 16 (5), 8213-8222.             |
| ZnO-V                                                | NO <sub>2</sub> <sup>-</sup> +CO <sub>2</sub> | 0.2 M NaHCO <sub>3</sub> +0.1 M NaNO <sub>2</sub> | 5.52mmol·h <sup>-1</sup> | 23.26%    | Cell Rep. Phys. Sci. 2021, 2 (3), 100378.     |
| Cu-TiO <sub>2</sub> -Vo                              | NO <sub>2</sub> <sup>-</sup> +CO <sub>2</sub> | 0.2 M HKCO <sub>3</sub> +0.02 M KNO <sub>2</sub>  | 20.8μmol·h <sup>-1</sup> | 43.1%     | Nat. Chem. 2020, 12 (8), 717-724.             |
| Ni <sub>3</sub> (BO <sub>3</sub> ) <sub>2</sub> -150 | N <sub>2</sub> +CO <sub>2</sub>               | 0.1 M KHCO <sub>3</sub>                           | 582.6                    | 20.36%    | Energy Environ. Sci. 2021, 14 (12), 6605-6615 |
| Vo-CeO <sub>2</sub> -750                             | NO <sub>3</sub> <sup>-</sup> +CO <sub>2</sub> | 0.1 M HKCO <sub>3</sub> +50 mM KNO <sub>3</sub>   | 943.6                    | NA        | J. Am. Chem. Soc.                             |
| B-FeNi-DASC                                          | NO <sub>3</sub> <sup>-</sup> +CO <sub>2</sub> | 0.1M KHCO <sub>3</sub> +50 Mm KNO <sub>3</sub>    | 1213.2                   | 17.8%     | Nature Communications 2022,13,5337            |
